# Supplementary material for: Prediction of Vaccine Response and Development of a Personalized Anti-SARS-CoV-2 Vaccination Strategy in Kidney Transplant Recipients: Results from a Large Single-Center Study
Source: MDPI journal article supplement (doi:10.3390/jpm12071107), 2022-07-05
Supplement: s1 [file s1]

Supplementary Table S1. Patient characteristics according to the antibody response after two vaccine doses (non-responders, weak responders, and moderate responders *versus* good responders)

|                                            | Antibody titer<br><143 BAU<br>(n = 437) | Antibody titer<br>>143 BAU<br>(n = 125) | p      |
|--------------------------------------------|-----------------------------------------|-----------------------------------------|--------|
| Age (years)                                | 56.9 (±12.7)                            | 55.9 (±14.6)                            | 0.51   |
| Male sex                                   | 262 (60%)                               | 82 (66%)                                | 0.25   |
| Comorbidities                              |                                         |                                         |        |
| BMI (kg/m <sup>2</sup> )                   | 26.6 (±5.72)                            | 26.7 (±5.59)                            | 0.83   |
| Cardiovascular disease                     | 114 (26%)                               | 34 (27%)                                | 0.8    |
| Diabetes                                   | 174 (40%)                               | 30 (24%)                                | <0.01  |
| Cancer                                     | 80 (18%)                                | 18 (14%)                                | 0.31   |
| Hypertension                               | 370 (85%)                               | 102 (82%)                               | 0.41   |
| Time from kidney transplantation (years)   | 7.97 (±7.06)                            | 14.5 (±9.08)                            | <0.001 |
| First transplantation                      | 363 (83%)                               | 111 (89%)                               | 0.12   |
| Living donor                               | 86 (20%)                                | 20 (16%)                                | 0.35   |
| CNI                                        |                                         |                                         | <0.001 |
| Tacrolimus                                 | 285 (65%)                               | 43 (34%)                                |        |
| Ciclosporin                                | 119 (27%)                               | 65 (52%)                                | -      |
| No CNI                                     | 33 (7.6%)                               | 17 (14%)                                | -      |
| Tacrolimus dose (mg)*                      | 5.47 (±3.19)                            | 4.75 (±2.67)                            | 0.12   |
| Tacrolimus trough level (µg/L)**           | 6.17 (±1.99)                            | 5.71 (±1.83)                            | 0.14   |
| Ciclosporin dose (mg)                      | 154 (±57.8)                             | 146 (±51.6)                             | 0.34   |
| Ciclosporin trough level (µg/L)            | 85.0 (±39.2)                            | 74.5 (±24.3)                            | 0.027  |
| MMF/MPA                                    | 370 (85%)                               | 78 (62%)                                | <0.001 |
| MMF/MPAs dose (mg)**                       | 1262 (±525)                             | 1046 (±491)                             | <0.001 |
| mTOR inhibitors                            | 60 (14%)                                | 29 (23%)                                | 0.011  |
| mTOR inhibitors dose (mg)*                 | 1262 (±525)                             | 1046 (±491)                             | <0.001 |
| mTOR inhibitors trough level (µg/L)        | 5.02 (±1.45)                            | 5.62 (±1.67)                            | 0.11   |
| Azathioprine                               | 5 (1.1%)                                | 8 (6.4%)                                | <0.01  |
| Belatacept                                 | 17 (3.9%)                               | 1 (0.81%)                               | 0.14   |
| Steroids                                   | 292 (67%)                               | 52 (42%)                                | <0.001 |
| Steroids dose (mg)*                        | 6.11 (±2.13)                            | 5.36 (±1.86)                            | <0.01  |
| Tacrolimus+MMF/MPA+steroids                | 177 (41%)                               | 17 (14%)                                | <0.001 |
| Serum creatinine (µmol/L)                  | 139 (±57.6)                             | 122 (±47.1)                             | <0.001 |
| Antibody titer before the second dose **** | 1.24 (±1.11)                            | 88.8 (±459)                             | 0.035  |

Data are expressed as means (± standard deviations) or counts (percentages), as appropriate.

Abbreviations: BMI, body mass index; CNI, calcineurin inhibitors; MMF, mycophenolate mofetil; MPA, mycophenolic acid; mTOR, mammalian target of rapamycin.

\*Missing data for one patient, \*\*Missing data for three patients, \*\*\*Missing data for four patients,

\*\*\*\*Missing data for two patients.

Supplementary Table S2. Patient characteristics according to the antibody response after three vaccine doses (non-responders, weak responders, and moderate responders *versus* good responders)

|                                             | Antibody titer<br>>143 BAU<br>(n = 101) | Antibody titer<br><143 BAU<br>(n = 208) | p      |
|---------------------------------------------|-----------------------------------------|-----------------------------------------|--------|
| Age (years)                                 | 56.6 ( $\pm$ 10.9)                      | 57.5 ( $\pm$ 13.3)                      | 0.5    |
| Male sex                                    | 80 (79%)                                | 117 (56%)                               | <0.001 |
| Comorbidities                               |                                         |                                         |        |
| BMI (kg/m <sup>2</sup> )                    | 27.6 ( $\pm$ 5.82)                      | 26.2 ( $\pm$ 6.04)                      | 0.05   |
| Cardiovascular disease                      | 22 (22%)                                | 56 (27%)                                | 0.33   |
| Diabetes                                    | 39 (39%)                                | 85 (41%)                                | 0.7    |
| Cancer                                      | 19 (19%)                                | 42 (20%)                                | 0.77   |
| Hypertension                                | 89 (88%)                                | 176 (85%)                               | 0.41   |
| Time from kidney transplantation<br>(years) | 10.3 ( $\pm$ 8.20)                      | 6.75 ( $\pm$ 6.14)                      | <0.001 |
| First transplantation                       | 88 (87%)                                | 162 (78%)                               | 0.052  |
| Living donor                                | 20 (20%)                                | 43 (21%)                                | 0.86   |
| CNI                                         |                                         |                                         | <0.001 |
| Tacrolimus                                  | 49 (49%)                                | 152 (73%)                               | -      |
| Ciclosporin                                 | 45 (45%)                                | 42 (20%)                                | -      |
| No CNI                                      | 7 (6.9%)                                | 14 (6.7%)                               |        |
| Tacrolimus dose (mg)*                       | 4.98 ( $\pm$ 2.77)                      | 5.76 ( $\pm$ 3.41)                      | 0.11   |
| Tacrolimus trough level ( $\mu$ g/L)**      | 6.30 ( $\pm$ 2.11)                      | 6.16 ( $\pm$ 1.92)                      | 0.69   |
| Ciclosporin dose (mg)                       | 154 ( $\pm$ 61.9)                       | 164 ( $\pm$ 56.1)                       | 0.4    |
| Ciclosporin trough level ( $\mu$ g/L)       | 79.3 ( $\pm$ 52.4)                      | 92.0 ( $\pm$ 28.0)                      | 0.16   |
| MMF/MPA                                     | 84 (83%)                                | 182 (88%)                               | 0.3    |
| MMF/MPAs dose (mg)*                         | 1277 ( $\pm$ 492)                       | 1240 ( $\pm$ 513)                       | 0.58   |
| mTOR inhibitors                             | 12 (12%)                                | 22 (11%)                                | 0.73   |
| mTOR inhibitor dose (mg)                    | 1.83 ( $\pm$ 0.72)                      | 2.09 ( $\pm$ 0.95)                      | 0.54   |
| mTOR inhibitor trough level ( $\mu$ g/L)    | 5.42 ( $\pm$ 1.87)                      | 4.81 ( $\pm$ 1.36)                      | 0.41   |
| Azathioprine                                | 2 (2%)                                  | 1 (0.48%)                               | 0.25   |
| Belatacept                                  | 1 (0.99%)                               | 11 (5.3%)                               | 0.11   |
| Steroids                                    | 54 (53%)                                | 159 (76%)                               | <0.001 |
| Steroids dose (mg)*                         | 6.23 ( $\pm$ 3.21)                      | 6.10 ( $\pm$ 1.89)                      | 0.77   |
| Tacrolimus+MMF/MPA+steroids                 | 28 (28%)                                | 109 (52%)                               | <0.001 |
| Serum creatinine ( $\mu$ mol/L)             | 127 ( $\pm$ 44.5)                       | 145 ( $\pm$ 57.3)                       | <0.01  |
| Antibody titer before the third dose        | 57.3 ( $\pm$ 152)                       | 2.20 ( $\pm$ 3.5)                       | <0.001 |

Data are expressed as means ( $\pm$  standard deviations) or counts (percentages), as appropriate.  
Abbreviations: BMI, body mass index; CNI, calcineurin inhibitors; MMF, mycophenolate mofetil;  
MPA, mycophenolic acid; mTOR, mammalian target of rapamycin.

\*Missing data for one patient, \*\*Missing data for three patients.
